# Supplementary material for: The Identification of Broomcorn Millet bZIP Transcription Factors, Which Regulate Growth and Development to Enhance Stress Tolerance and Seed Germination
Source: MDPI journal article supplement (doi:10.3390/ijms23126448), 2022-06-09
Supplement: s1 [file s1]

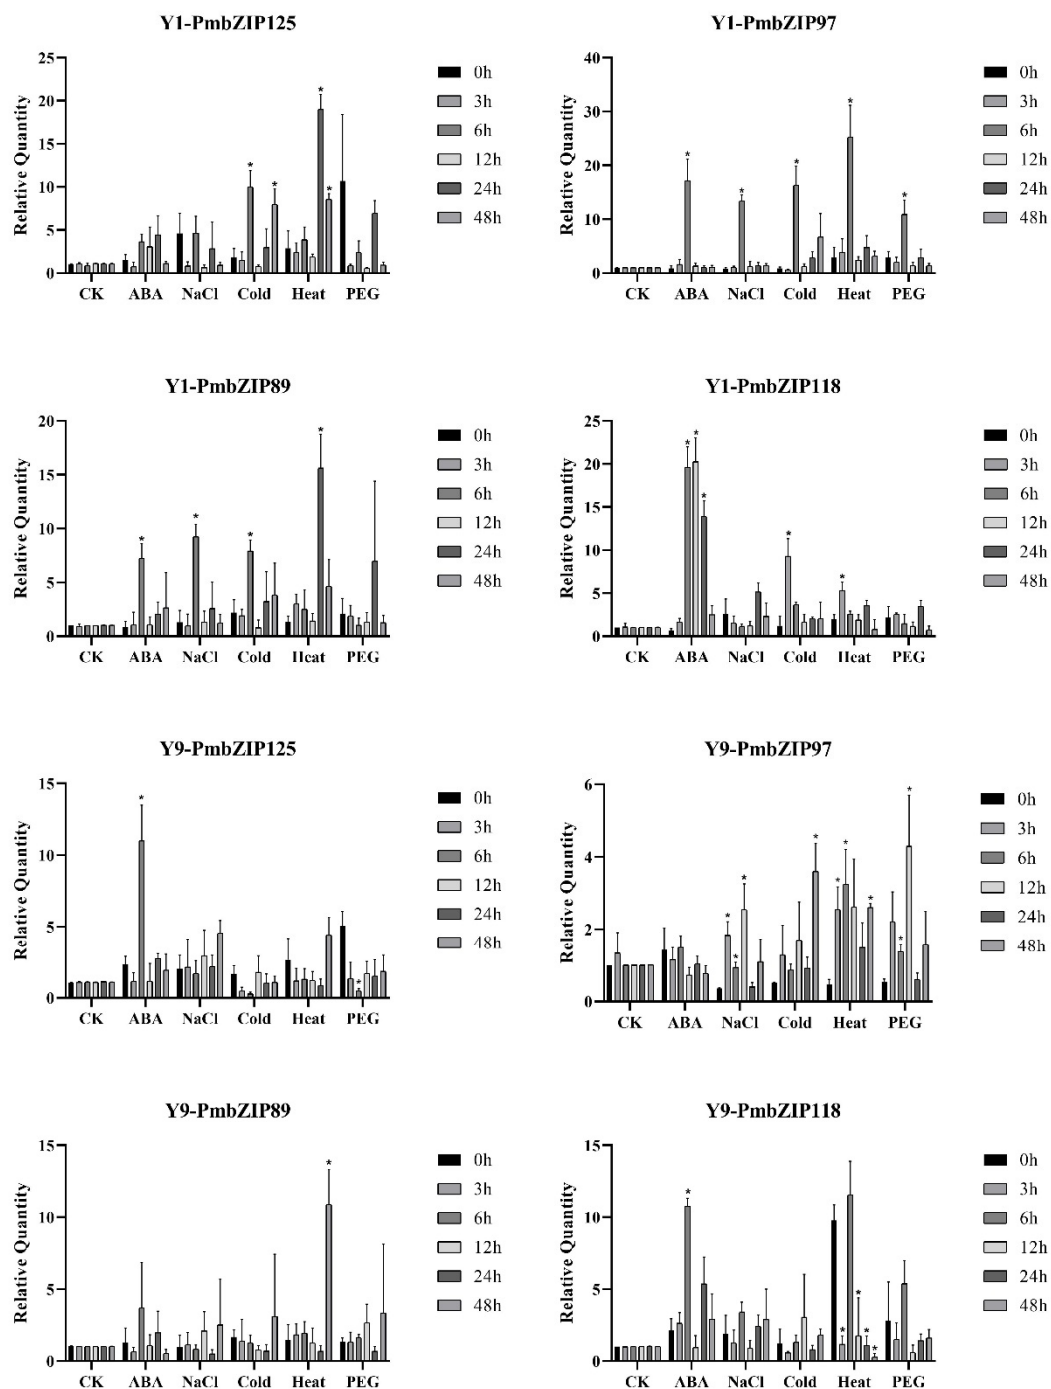

**Figure S1.** Expression pattern of *PmbZIP125*, *PmbZIP97*, *PmbZIP89* and *PmbZIP118*. Error bars are SD based on three biological replicates and three technical repeats. \*: p value < 0.05.

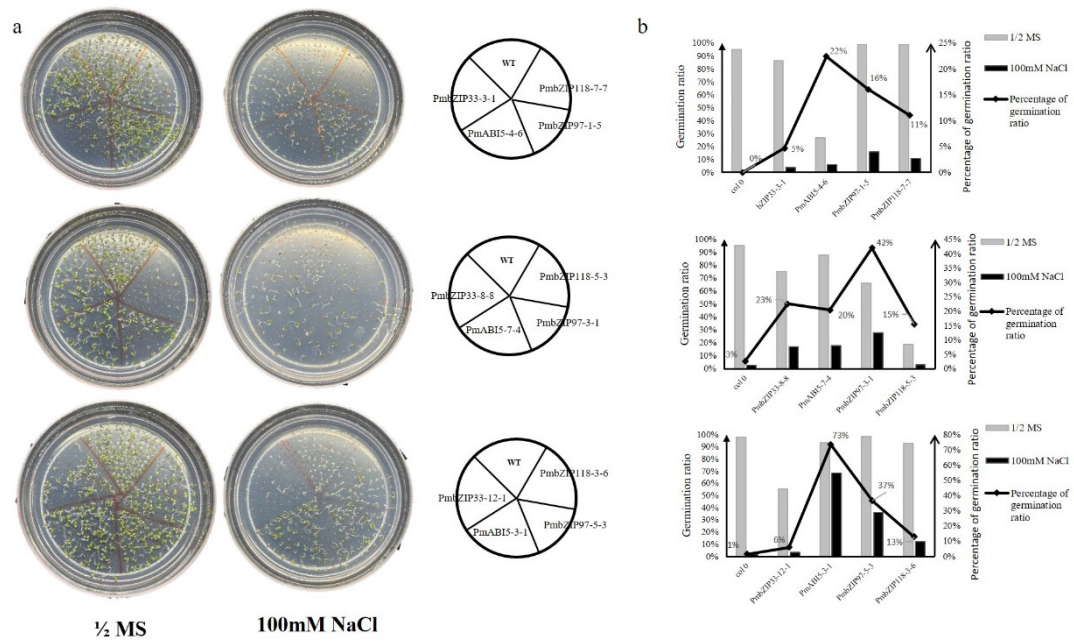

**Figure S2.** Germination of overexpression transgene lines. (a) OE:*PmABI5* germination phenotype on Day 8. (b) OE:*PmABI5* seed germination under different treatment. The left axis represents the germination ratio of different genotypes under  $\frac{1}{2}$  MS and 100mM NaCl treatment (columns). The right axis represents the percentage germination ratio under 100mM NaCl treatment compared to that under  $\frac{1}{2}$  MS condition. At least 50 seeds for each genotype were used for the germination assay.

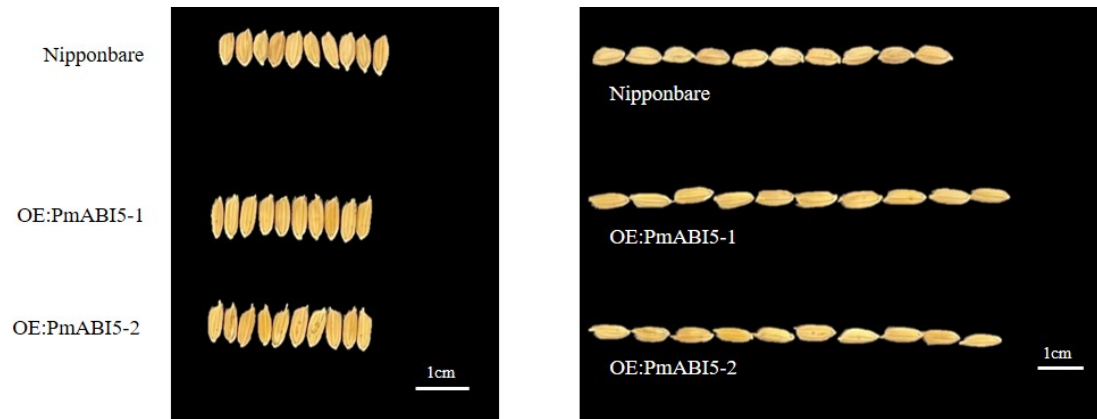

**Figure S3.** The seed size of PmABI5 rice overexpression transgene lines
